# Supplementary material
Source: PubMed Central journal article supplement (PMC6084780)
Supplement: NIHMS952186-supplement-1.pdf [file NIHMS952186-supplement-1.pdf]

## Supplementary Data

### **MPO promoter polymorphism (rs2333227) programs malignant phenotypes of colorectal cancer by altering the binding affinity of AP-2 $\alpha$**

Qingtao Meng<sup>1#</sup>, Shenshen Wu<sup>1#</sup>, Yajie Wang<sup>1</sup>, Jin Xu<sup>2</sup>, Hao Sun<sup>1</sup>, Runze Lu<sup>1</sup>, Na Gao<sup>3</sup>, Hongbao Yang<sup>4</sup>, Xiaobo Li<sup>1</sup>, Boping Tang<sup>5</sup>, Michael Aschner<sup>6</sup>, Rui Chen<sup>1,7\*</sup>

<sup>1</sup>Key Laboratory of Environmental Medicine Engineering, Ministry of Education, School of Public Health, Southeast University, Nanjing, China;

<sup>2</sup> Department of Maternal, Child and Adolescent Health, School of Public Health, Nanjing Medical University, Nanjing 211166, China

<sup>3</sup>Institute of Bioinformatics, Heinrich Heine University, Düsseldorf, Germany;

<sup>4</sup>Center for Drug Safety Evaluation and Research, China Pharmaceutical University, Nanjing, 211198, China;

<sup>5</sup>Jiangsu Key Laboratory for Bioresources of Saline Soils, Jiangsu Synthetic Innovation Center for Coastal Bioagriculture, Yancheng Teachers University, Yancheng, 224002, China.

<sup>6</sup>Department of Molecular Pharmacology, Albert Einstein College of Medicine, Forchheimer 209, 1300 Morris Park Avenue, Bronx, NY 10461, USA

<sup>7</sup>Institute for Chemical Carcinogenesis, Guangzhou Medical University, Guangzhou 511436, China

# These authors contributed equally to this work.

**Running title: *MPO* polymorphism and colorectal cancer development**

**Key words: colorectal cancer; *MPO*; survival; AP-2 $\alpha$ ; polymorphism**

**\*Correspondence author: Rui Chen**, Key Laboratory of Environmental Medicine Engineering, Ministry of Education, School of Public Health, Southeast University, 87 Dingjiaqiao, Gulou District, Nanjing 210009, China. Tel: +86 25 83272560; Fax: +86 25 83324322; Email: [101011816@seu.edu.cn](mailto:101011816@seu.edu.cn).

**Fig.S1 Creation of the genomic MPO -463 C>T mutation in CRC cells with CRISPR/cas9**

(A) Upper panel, schematic of the CRISPR/Cas9-mediated DNA cleavage. The wild type rs2333227 bases are shown in red. The sgRNA sequence is shown in green. The sequence for the single-stranded DNA donor is described in the bottom part. (B) Sanger sequencing for wild-type and mutation in CRC cells (SW620, andSW480) with CRISPR/Cas9-mediated.

**Figure S1**

**A**

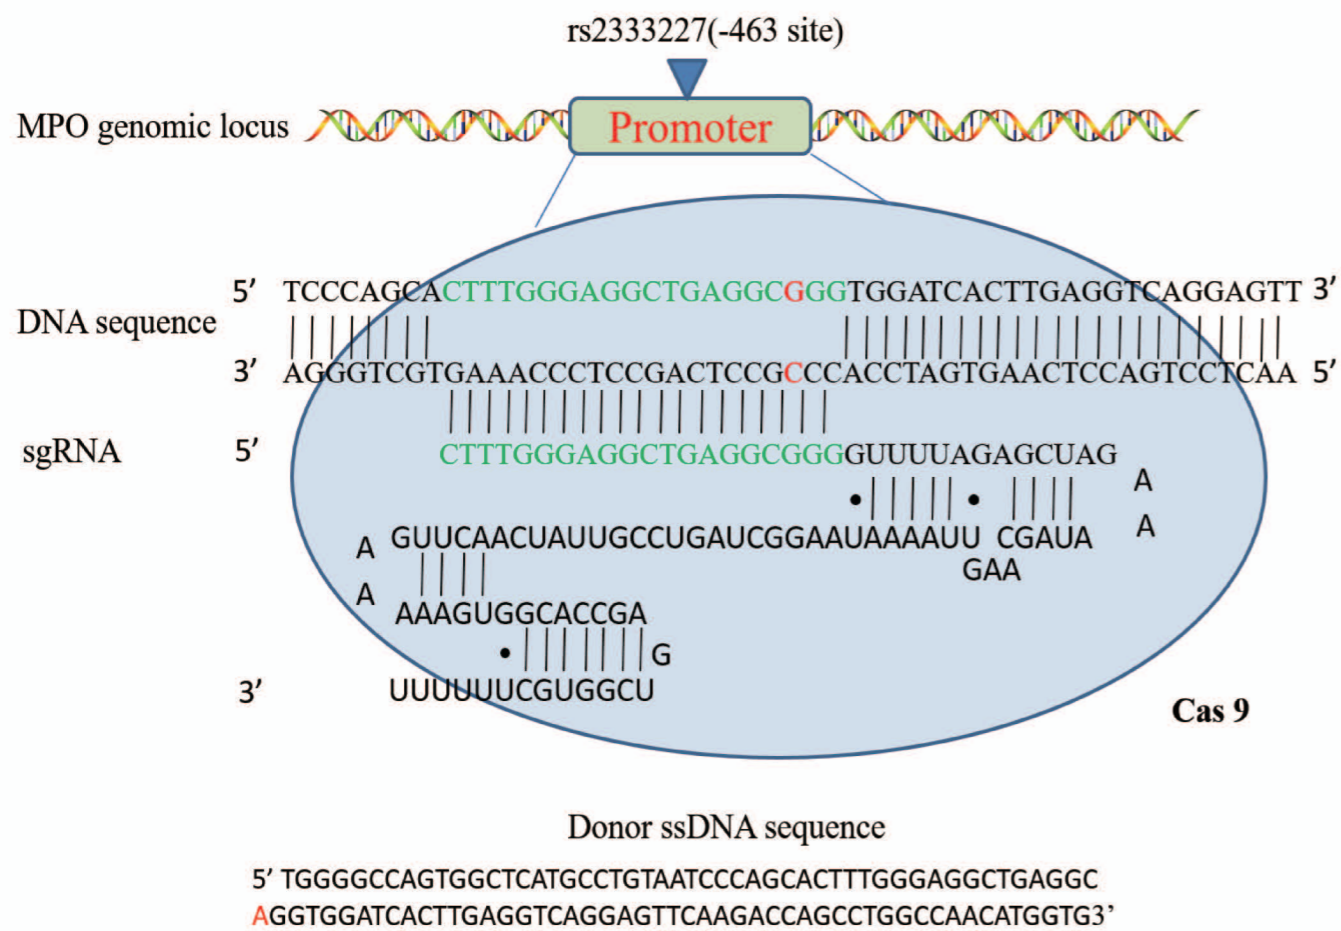

**B**

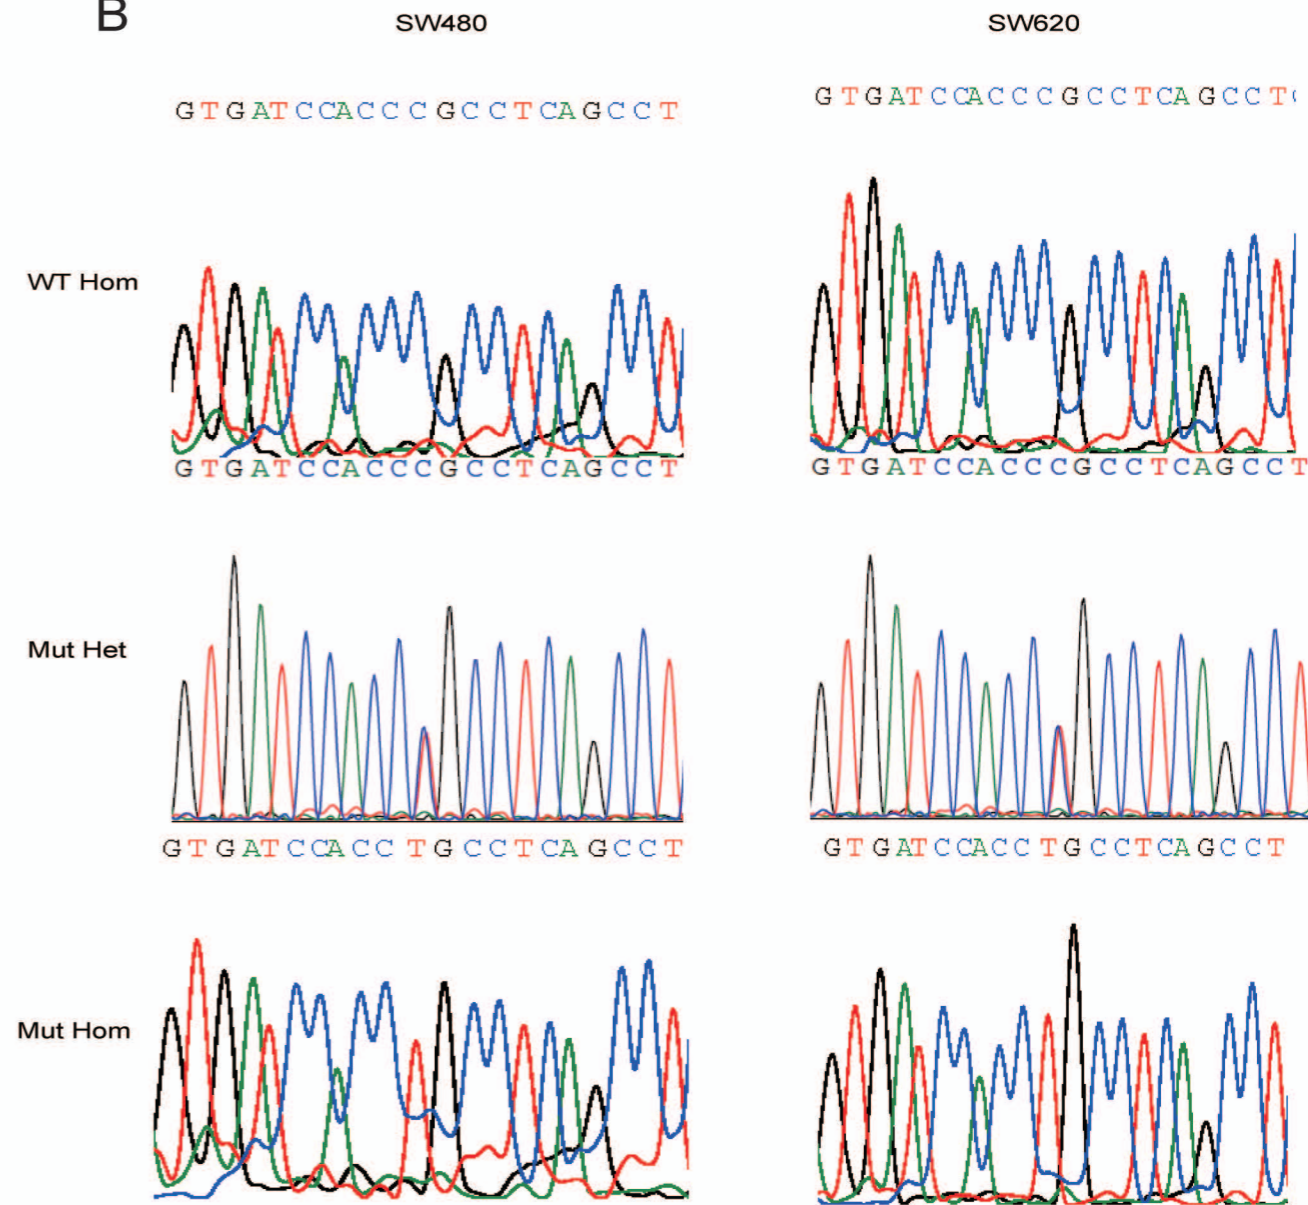

**Fig.S2 Protein interaction network for genes regulated by MPO**

(A-I) Correlation analysis between mRNA expression levels of MPO and 9 genes predicted to interact with MPO.

**Figure S2**

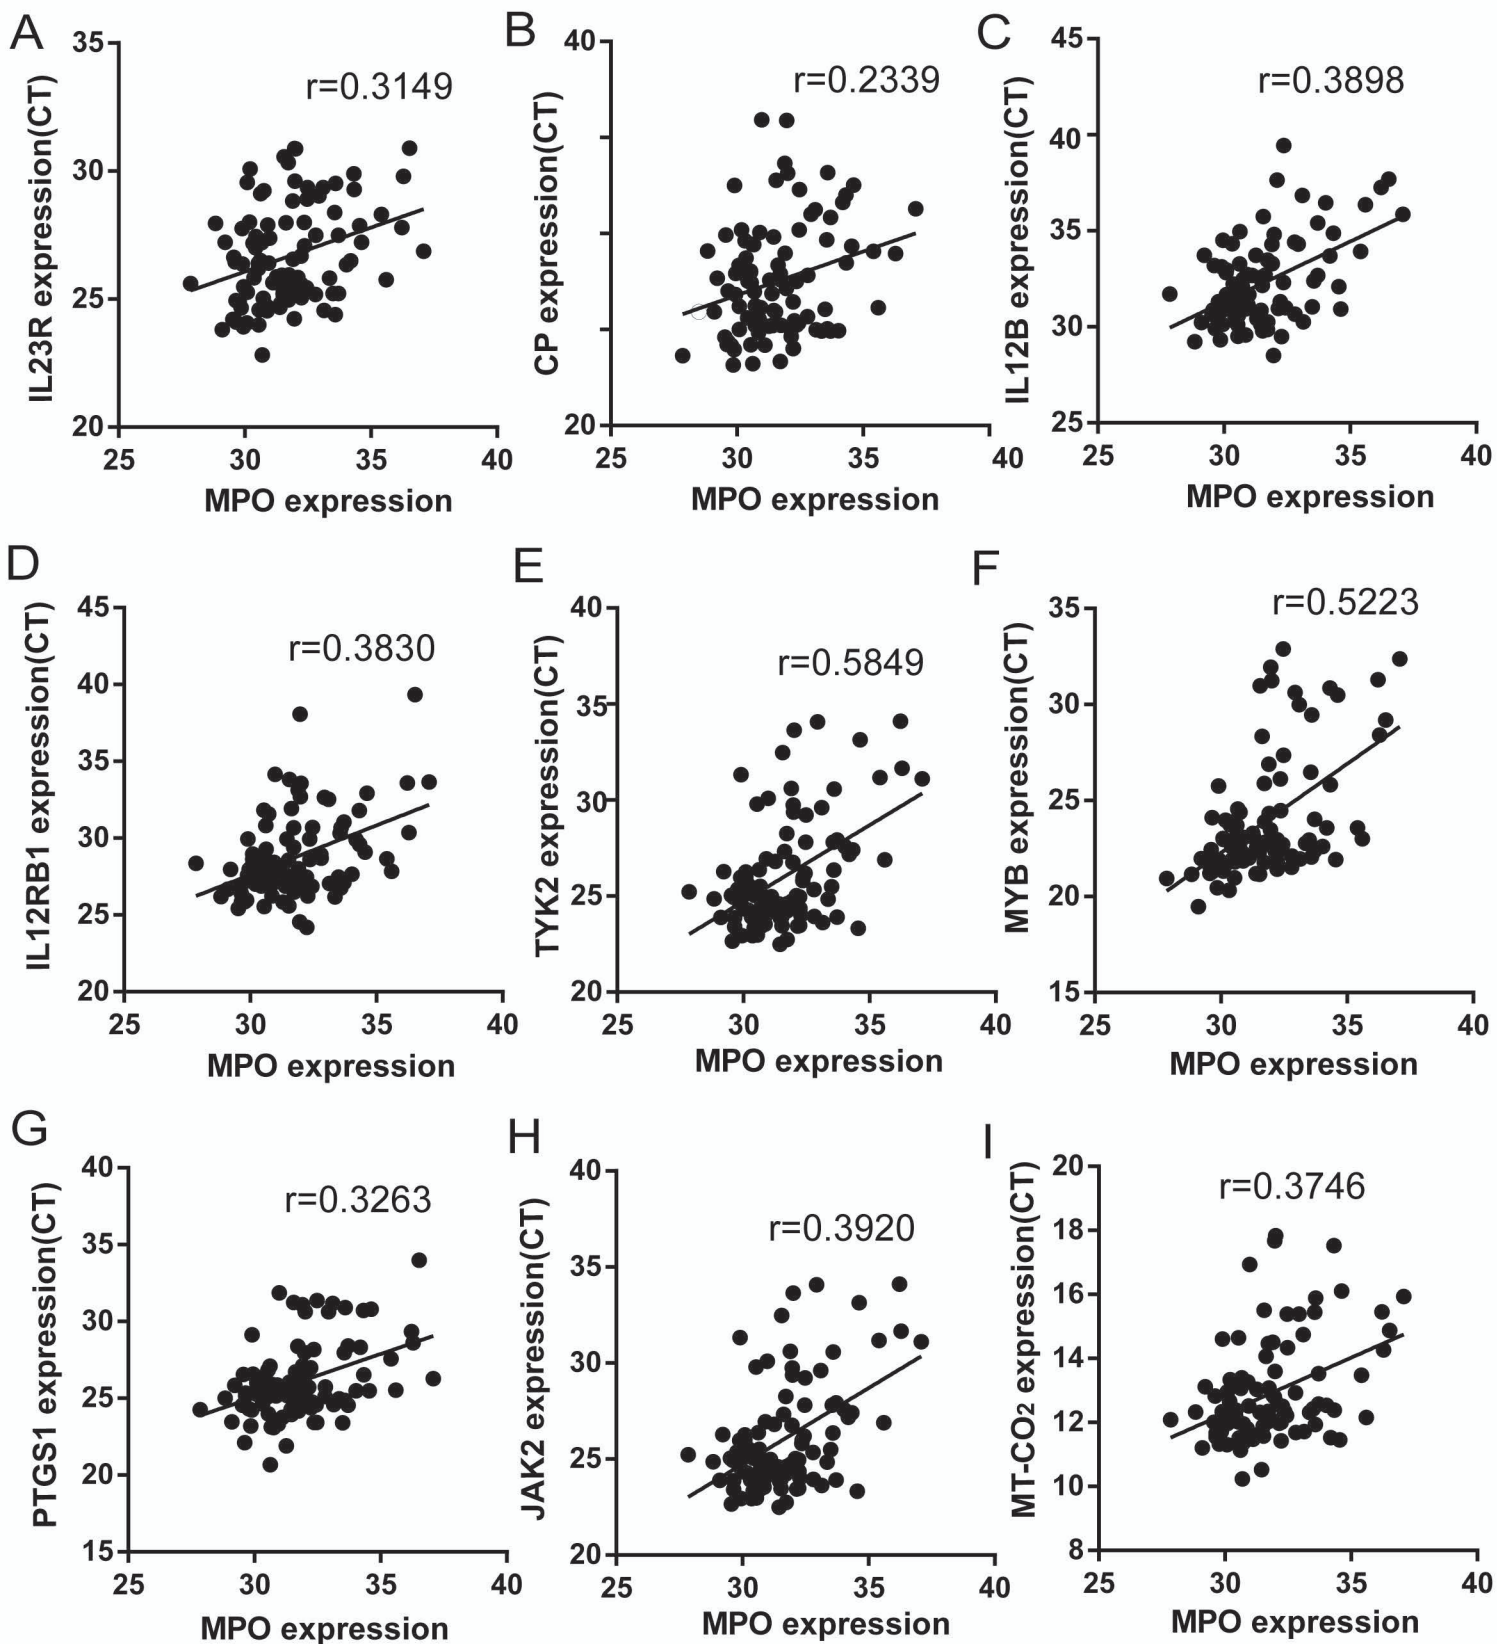

**Fig.S3 MPO, IL-23A and MMP9 expression in wild type and CRISPR/Cas9-mediated CRC cell**

(A-F) MPO, IL-23A and MMP9 mRNA expression levels were detected in CRC cells by qRT-PCR (A, C, E: SW620, and B, D, F: SW480). (G, H) The MPO levels of CRC cell culture supernatant were detected by ELISA (G: SW620, and H: SW480). (I, J) IL-23A levels of CRC cell culture supernatant were detected by ELISA (G: SW620, and H: SW480). \*\*\*  $P < 0.001$ , \*\*  $P < 0.01$ , \* $P < 0.05$ .

**Figure S3**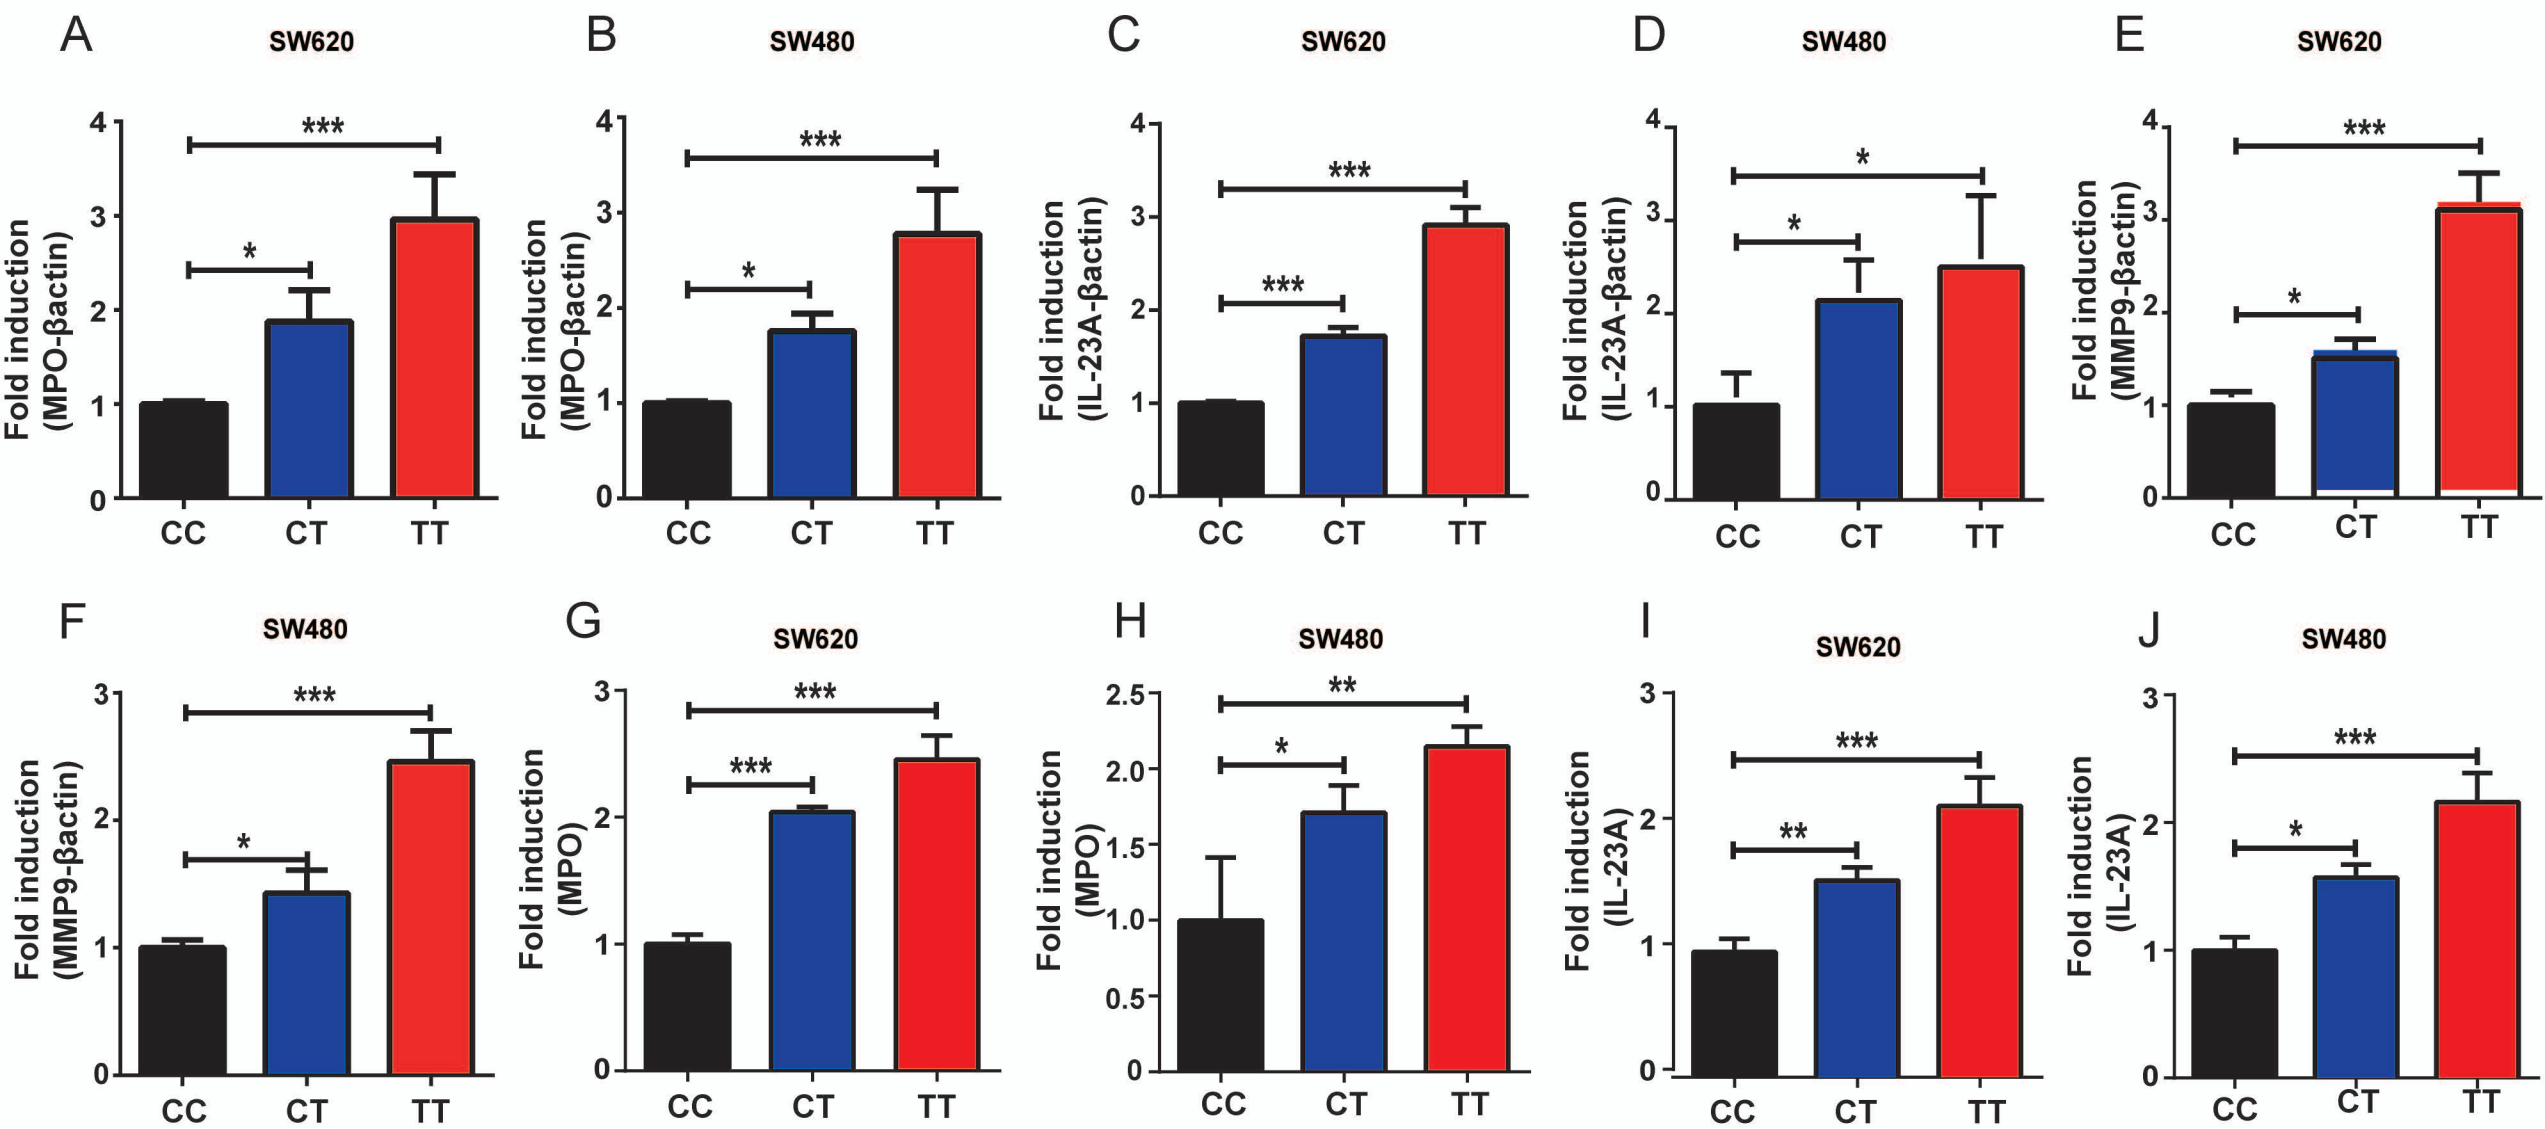



Table S1. Stratification analysis of the *MPO* rs2333227 genotypes associated with CRC risk by demographic variables.

| Variables             | Genotypes (cases/controls) |         | P      | Adjusted OR<br>(95% CI) <sup>a</sup> |
|-----------------------|----------------------------|---------|--------|--------------------------------------|
|                       | GG                         | GT/TT   |        |                                      |
| Age                   |                            |         |        |                                      |
| ≤56                   | 405/454                    | 162/151 | 0.1624 | 1.20(0.92-1.56)                      |
| >56                   | 341/421                    | 170/149 | 0.0103 | 1.42(1.09-1.85)                      |
| Gender                |                            |         |        |                                      |
| Male                  | 476/517                    | 183/169 | 0.1912 | 1.18(0.92-1.51)                      |
| Female                | 270/358                    | 149/131 | 0.0043 | 1.53(1.15-2.04)                      |
| Drinking status       |                            |         |        |                                      |
| Never                 | 510/630                    | 226/220 | 0.0331 | 1.21(0.97-1.51)                      |
| Ever                  | 236/245                    | 106/80  | 0.0663 | 1.45(0.96-2.21)                      |
| Smoking status        |                            |         |        |                                      |
| Never                 | 457/581                    | 212/208 | 0.0252 | 1.24(0.98-1.57)                      |
| Ever                  | 289/294                    | 120/92  | 0.0794 | 1.21(0.84-1.73)                      |
| Location              |                            |         |        |                                      |
| Colon                 | 308/875                    | 167/300 | <.0001 | 1.64(1.30-2.08)                      |
| Rectum                | 438/875                    | 165/300 | 0.4055 | 1.10(0.88-1.37)                      |
| Grade                 |                            |         |        |                                      |
| Low                   | 246/875                    | 110/300 | 0.0451 | 1.31(1.01-1.71)                      |
| Intermediate/High     | 500/875                    | 222/300 | 0.0135 | 1.31(1.07-1.61)                      |
| Depth of invasion     |                            |         |        |                                      |
| T1                    | 28/875                     | 7/300   | 0.4586 | 1.14(0.89-1.47)                      |
| T2                    | 178/875                    | 66/300  | 0.622  | 1.09(0.87-1.37)                      |
| T3                    | 139/875                    | 65/300  | 0.0585 | 1.25(0.99-1.57)                      |
| T4                    | 401/875                    | 194/300 | 0.0017 | 1.44(1.09-1.91)                      |
| Lymph node metastasis |                            |         |        |                                      |
| N0                    | 453/875                    | 168/300 | 0.4848 | 1.08(0.87-1.35)                      |
| N1                    | 293/875                    | 164/300 | <.0001 | 1.67(1.32-2.11)                      |
| Distant metastasis    |                            |         |        |                                      |
| M0                    | 681/875                    | 277/300 | 0.0803 | 1.20(0.99-1.46)                      |
| M1                    | 65/875                     | 55/300  | <.0001 | 2.49(1.70-3.66)                      |
| TNM                   |                            |         |        |                                      |
| I                     | 151/875                    | 45/300  | 0.4423 | 0.86(0.60-1.23)                      |
| II                    | 286/875                    | 115/300 | 0.2168 | 1.18(0.92-1.53)                      |
| III                   | 244/875                    | 117/300 | 0.0102 | 1.44(1.11-1.87)                      |
| IV                    | 65/875                     | 55/300  | <.0001 | 2.49(1.70-3.66)                      |

<sup>a</sup> Adjusted for age, Gender, smoking and drinking status.

Table S2. Stratification analysis of the rs2333227 genotypes associated with colorectal cancer patients' survival

| Variables             | Genotypes(Patients/Deaths) |         | P      | Adjusted HR<br>(95% CI) <sup>a</sup> |
|-----------------------|----------------------------|---------|--------|--------------------------------------|
|                       | CC                         | CT/TT   |        |                                      |
| Age                   |                            |         |        |                                      |
| ≤56                   | 405/226                    | 162/100 | 0.0413 | 1.10(0.87-1.40)                      |
| >56                   | 341/201                    | 170/117 | 0.007  | 1.33(1.05-1.67)                      |
| Gender                |                            |         |        |                                      |
| Male                  | 476/290                    | 183/120 | 0.096  | 0.97(0.78-1.21)                      |
| Female                | 270/137                    | 149/97  | 0.0003 | 1.61(1.24-2.10)                      |
| Drinking status       |                            |         |        |                                      |
| Never                 | 457/246                    | 212/136 | 0.0011 | 1.24(1.01-1.53)                      |
| Ever                  | 289/181                    | 120/81  | 0.1393 | 1.17(0.88-1.55)                      |
| Smoking status        |                            |         |        |                                      |
| Never                 | 510/275                    | 226/140 | 0.0105 | 1.25(1.01-1.54)                      |
| Ever                  | 236/152                    | 106/77  | 0.0126 | 1.13(0.87-1.48)                      |
| Location              |                            |         |        |                                      |
| Colon                 | 308/191                    | 167/114 | 0.0503 | 1.20(0.95-1.52)                      |
| Rectum                | 438/236                    | 165/103 | 0.0083 | 1.19(0.94-1.51)                      |
| Grade                 |                            |         |        |                                      |
| Low                   | 246/157                    | 110/79  | 0.0208 | 1.14(0.87-1.51)                      |
| Intermediate/High     | 500/270                    | 222/138 | 0.0089 | 1.25(1.02-1.54)                      |
| Depth of invasion     |                            |         |        |                                      |
| T1                    | 28/8                       | 7/5     | 0.0513 | 5.70(1.32-24.66)                     |
| T2                    | 178/75                     | 66/33   | 0.1144 | 1.37(0.91-2.07)                      |
| T3                    | 139/75                     | 65/35   | 0.6826 | 1.15(0.77-1.73)                      |
| T4                    | 401/269                    | 194/144 | 0.0123 | 1.33(1.09-1.64)                      |
| Lymph node metastasis |                            |         |        |                                      |
| N0                    | 453/193                    | 168/68  | 0.9411 | 0.93(0.70-1.23)                      |
| N1                    | 293/234                    | 164/149 | 0.0005 | 1.45(1.17-1.78)                      |
| Distant metastasis    |                            |         |        |                                      |
| M0                    | 681/371                    | 277/164 | 0.0635 | 1.20(1.00-1.45)                      |
| M1                    | 65/56                      | 55/53   | 0.0309 | 1.40(0.95-2.08)                      |
| TNM                   |                            |         |        |                                      |
| I                     | 151/44                     | 45/12   | 0.9236 | 0.89(0.46-1.70)                      |
| II                    | 286/134                    | 115/49  | 0.6212 | 0.89(0.64-1.25)                      |
| III                   | 244/193                    | 117/103 | 0.0425 | 1.29(1.01-1.65)                      |
| IV                    | 65/56                      | 55/53   | 0.0309 | 1.40(0.95-2.08)                      |

<sup>a</sup> Adjusted for age, Gender, smoking and drinking status, location, grade, TNM stage.

Table S3. Stepwise Cox regression analysis of colorectal cancer survival

| Entered variables                | b       | SE      | HR (95% CI)     | P      |
|----------------------------------|---------|---------|-----------------|--------|
| Age (> 56 vs. ≤56)               | 0.4514  | 0.08083 | 1.57(1.34-1.84) | <.0001 |
| Drinking status (Ever vs. Never) | 0.32549 | 0.08337 | 1.39(1.18-1.63) | <.0001 |
| TNM (III/IV vs. I/II)            | 1.75775 | 0.08697 | 5.80(4.89-6.88) | <.0001 |
| rs2333227 (CT/TT vs. CC)         | 0.20785 | 0.08371 | 1.23(1.05-1.45) | 0.013  |

β, regression coefficient

Table S4. The serum MPO levels of CRC patients with rs2333227 genotypes

|               | CC      | CT/TT   |
|---------------|---------|---------|
| N             | 40      | 40      |
| mean          | 463.3   | 535.5   |
| SD            | 30.2    | 43.0    |
| Range (ng/ml) | 389-543 | 474-631 |
